# Supplementary material for: Conductive layer protected and oxide catalyst-coated thin-film silicon solar cell as an efficient photoanode
Source: Royal Society of Chemistry journal article supplement (doi:10.1039/c7cy01862b), 2017-01-01
Supplement: c7cy01862b1.pdf [file c7cy01862b1.pdf]

## Supporting Information

### **Conductive Layer Protected and Oxide Catalyst Coated Thin-Film Silicon Solar Cell as Efficient Photoanode**

Ning Wang,<sup>ab</sup> Min Liu,<sup>c</sup> Junhui Liang,<sup>a</sup> Tiantian Li,<sup>a</sup> Hairen Tan,<sup>cd</sup> Bofei Liu,<sup>a</sup> Qixing Zhang,<sup>a</sup>  
Changchun Wei,<sup>a</sup> Ying Zhao,<sup>ab</sup> and Xiaodan Zhang<sup>\*ab</sup>

<sup>a</sup> Institute of Photoelectronic Thin Film Devices and Technology of Nankai University, Key Laboratory  
of Photoelectronic Thin Film Devices and Technology, Tianjin 300071, P. R. China

<sup>b</sup> Collaborative Innovation Center of Chemical Science and Engineering (Tianjin), Tianjin 300071, P.  
R. China

<sup>c</sup> Department of Electrical and Computer Engineering, University of Toronto, 35 St George Street,  
Toronto, Ontario M5S1A4, Canada

<sup>d</sup> Photovoltaic Materials and Devices Laboratory, Delft University of Technology, 2628CD Delft, The  
Netherlands

\*Corresponding author: Tel.: +86-22-23499304; fax: +86 22-23499304; E-mail  
address:

\*[xdzhang@nankai.edu.cn](mailto:xdzhang@nankai.edu.cn)

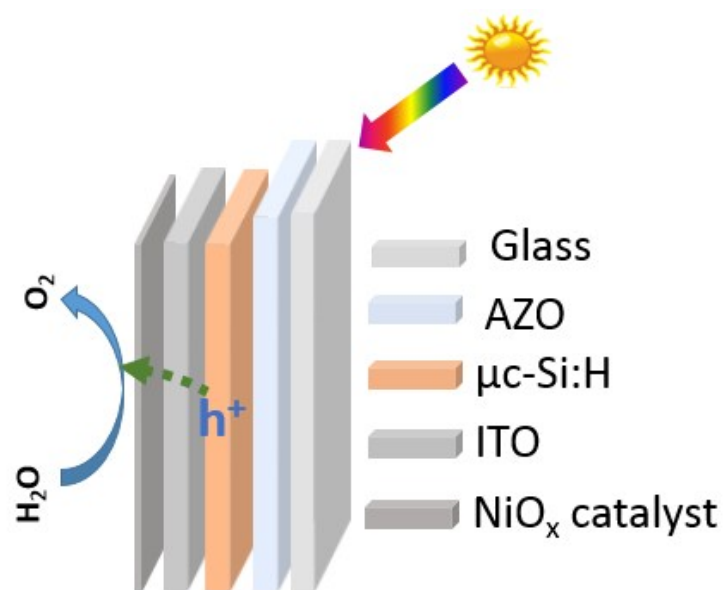

**Figure S1.** The scheme structure of  $\mu\text{c-Si:H}$  solar cell photoanode.

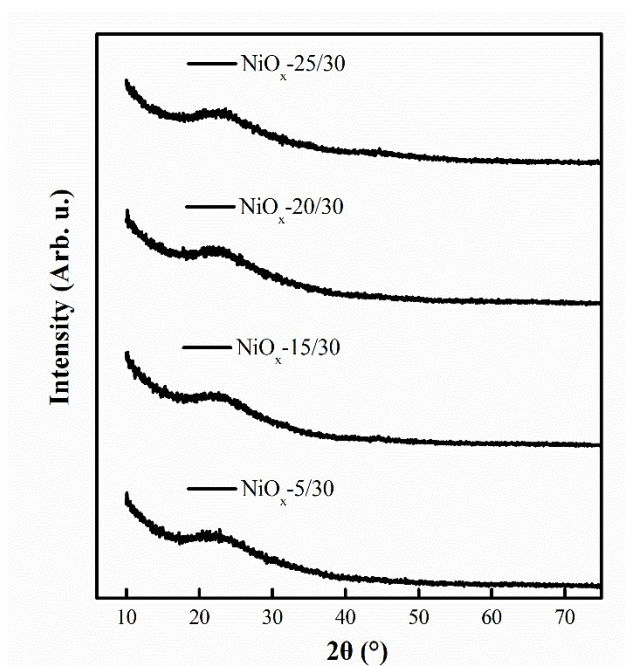

**Figure S2.** The XRD patterns of  $\text{NiO}_x$  catalysts with different  $\text{O}_2/\text{Ar}$ .

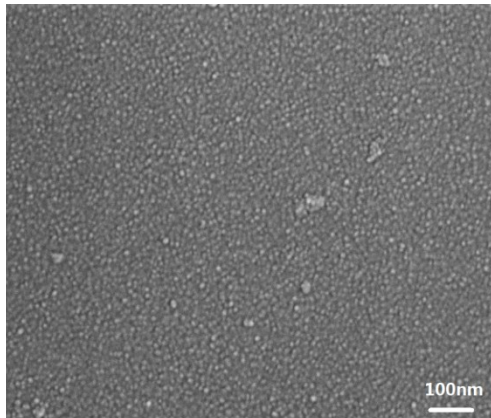

**Figure S3.** The surface SEM image of NiO<sub>x</sub>-20/30.

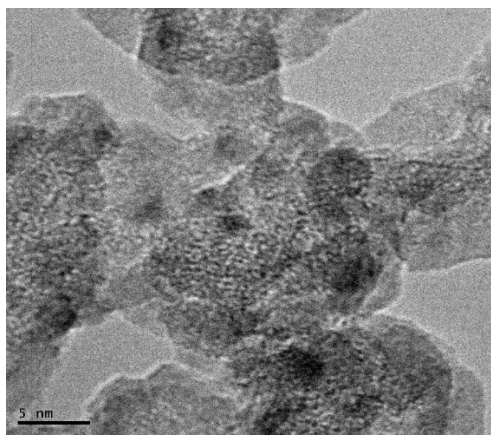

**Figure S4.** The TEM image of NiO<sub>x</sub>-20/30.

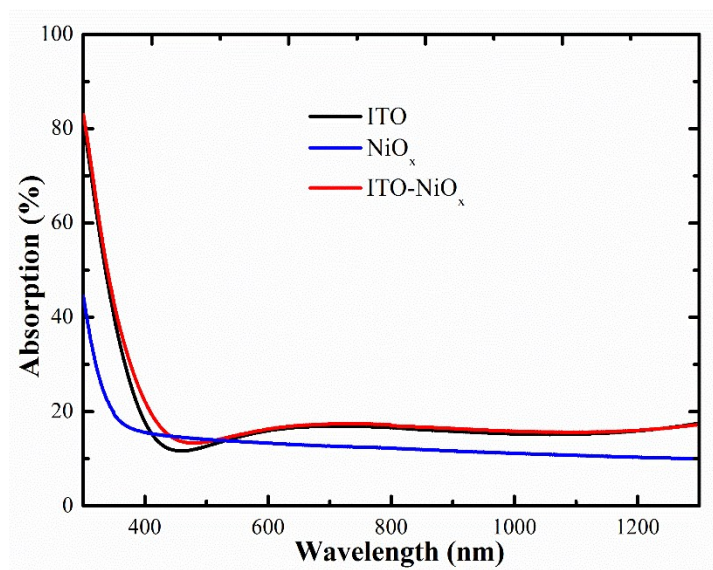

**Figure S5.** The absorption curves of the ITO layer, NiO<sub>x</sub> catalyst and the combination of ITO and NiO<sub>x</sub>-20/30 layer.

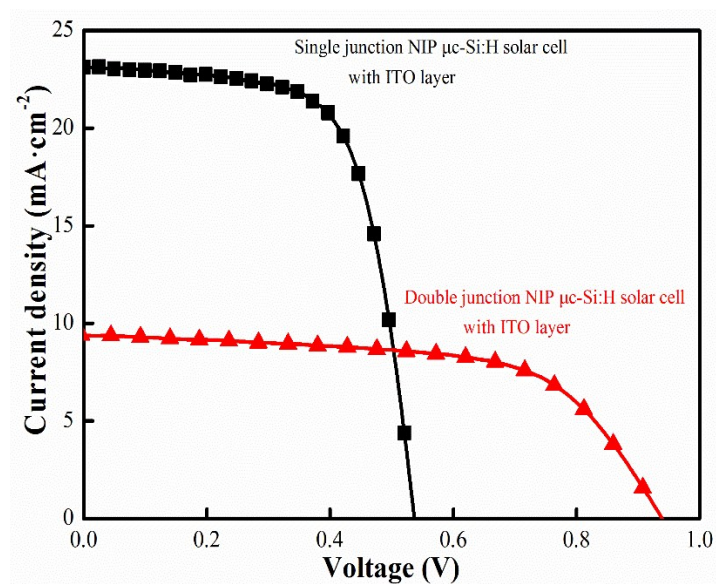

**Figure S6.** The I-V curves of single junction NIP and double junction NIP  $\mu\text{-Si:H}$  solar cells with ITO layer.
